# Supplementary material for: Direct and Molecular Observation of Movement and Reproduction by Candy Darter, Etheostoma osburni, an Endangered Benthic Stream Fish in Virginia, USA
Source: MDPI journal article supplement (doi:10.3390/fishes7010030), 2022-01-27
Supplement: s1 [file s1]

(a)

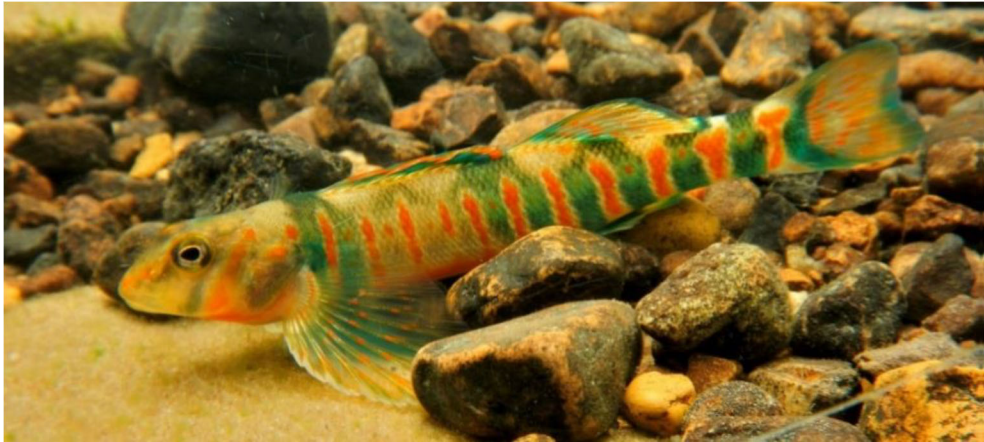

(b)

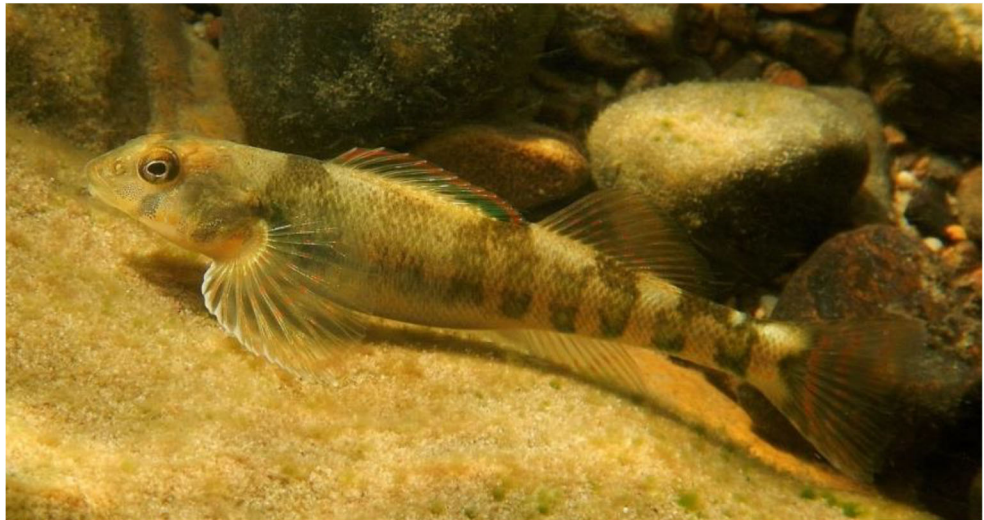

(c)

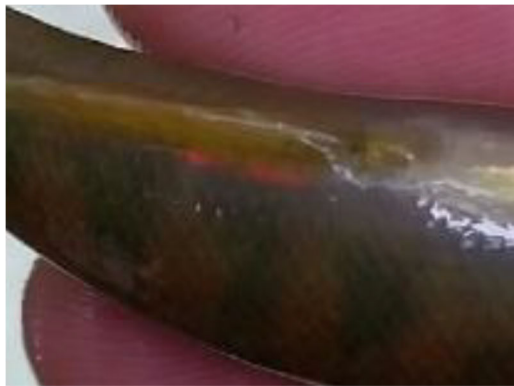

**Figure S1.** Adult Candy Darter male (a) and female (b). Red visual implant elastomer tag on dorsal surface of Candy Darter (c).

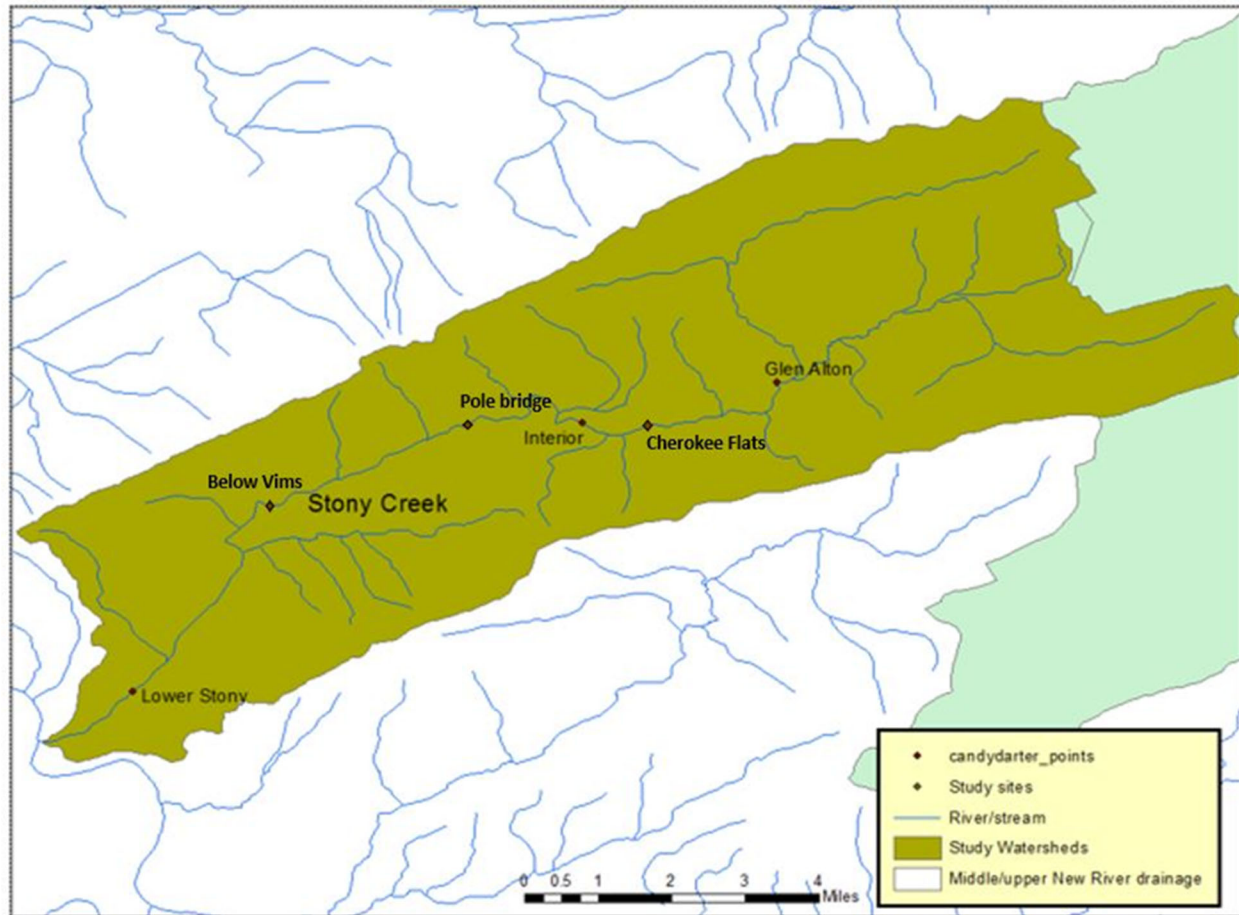

**Figure S2.** Stony Creek watershed in Giles County, Virginia. The locations of six study sites are also shown. “candydarter\_points” = presence of study species at that study site.

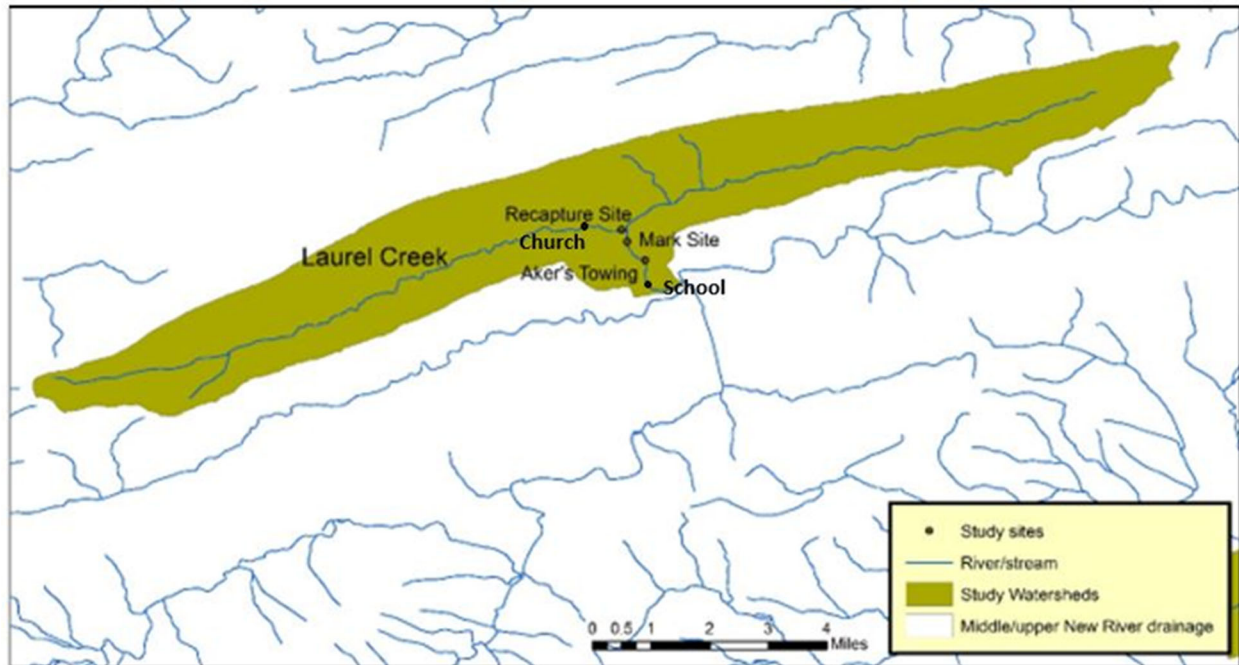

**Figure S3.** Laurel Creek watershed in Bland County, Virginia. The locations of all study sites are shown.
